# Supplementary material for: Nanowires self-assemble into β-MnO2 nanospheres to form crosslinking 3D hierarchical porous networks: with template-free fabrication and good supercapacitive performance over a broad temperature range
Source: Royal Society of Chemistry journal article supplement (doi:10.1039/d1se00995h), 2021-01-01
Supplement: d1se00995h1.pdf [file d1se00995h1.pdf]

# Nanowires self-assembling $\beta$ -MnO<sub>2</sub> nanospheres to form cross-linking 3D hierarchical porous networks: template-free fabrication and good supercapacitive performance at a broad temperature

Li-Li Yu<sup>a\*</sup>, Wei-Ling Xu<sup>a</sup>, Jian-Guo Zhang<sup>a</sup>, Shuang Li<sup>a</sup>, Rong-Bing Li<sup>a</sup>, Jing-Tai Zhao<sup>b</sup>

<sup>a</sup> School of Material Science and Engineering, Shanghai University, Shanghai, 200444, P.R. China

<sup>b</sup> School of Materials Science and Engineering, Guilin University of Electronic Technology, Guilin  
541004, China

Correspond to: [lly522@shu.edu.cn](mailto:lly522@shu.edu.cn)

**Table S1** molar ratio, productivity of as-prepared  $\beta$ -MnO<sub>2</sub>

| Sample           | 1,3-butanediol /KMnO <sub>4</sub> <sup>a</sup> | yield [%] |
|------------------|------------------------------------------------|-----------|
| S-1              | 0.5                                            | ~85       |
| S <sub>CPS</sub> | 0.8                                            | ~97.7     |
| S-2              | 1.2                                            | ~94       |

a- Molar ratio, the use of KMnO<sub>4</sub> is the same in all samples;

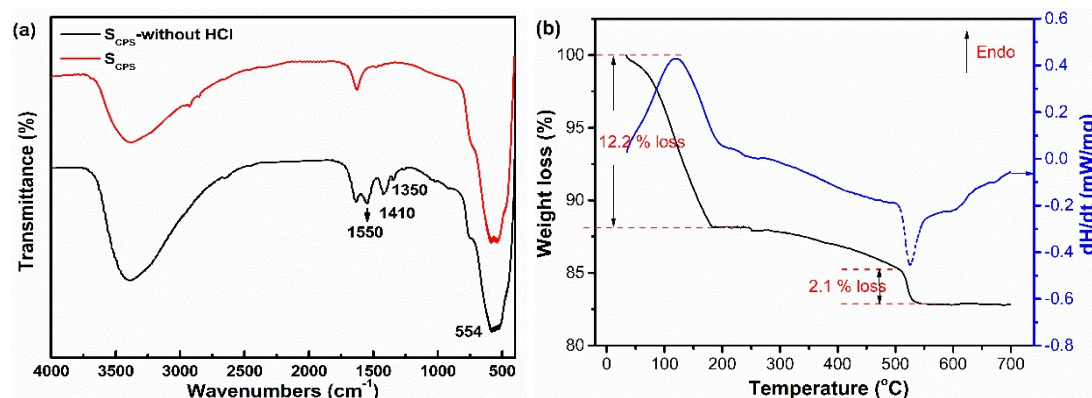

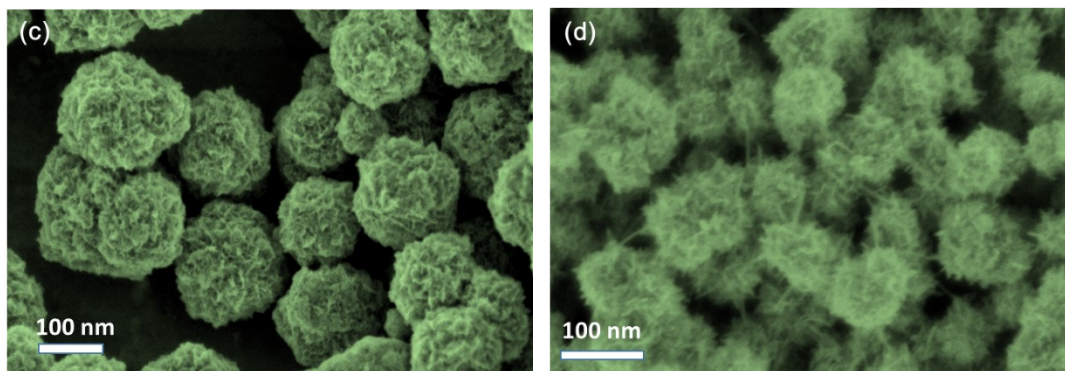

**Fig. S1.** IR spectra (a) of samples  $S_{CPS}$  and  $S_{CPS}$ -without HCl, and TG TG-DSC curves (b) of sample  $S_{CPS}$ . And SEM images of sample S-1 (c) and S-2 (d)

As shown in Fig. S1a, compared to sample  $S_{CPS}$ , peaks centered at  $1550\text{ cm}^{-1}$ ,  $1410\text{ cm}^{-1}$ ,  $1350\text{ cm}^{-1}$ , assigned to the COO- antisymmetric and symmetric stretching vibrations, and O-H stretching vibrations of suspended hydroxyl, are clearly seen in the IR spectrum of sample  $S_{CPS}$  before washed by 0.5 M hydrochloric (named as  $S_{CPS}$ -without HCl), suggesting the formation of some by-product of organic salt [1], which can solute in hydrochloric.

As shown in Fig. S1b, only two weight loss  $\sim 12.2\%$  and  $\sim 2.1\%$  with two exothermic peaks (around  $130^\circ\text{C}$  and  $520^\circ\text{C}$ ) are detected. The former can be attributed to the evaporation of the physical absorbed water, and the latter is derived from the phase transformation from  $\text{MnO}_2$  to  $\text{Mn}_2\text{O}_3$ , which is proved by our previous literatures [2, 3]. In addition, no other endo/exothermic peaks are detected in temperature region of  $210\sim 520^\circ\text{C}$ , suggesting that no other chemical reaction happens in the heat process from room temperature to  $500^\circ\text{C}$  in air.

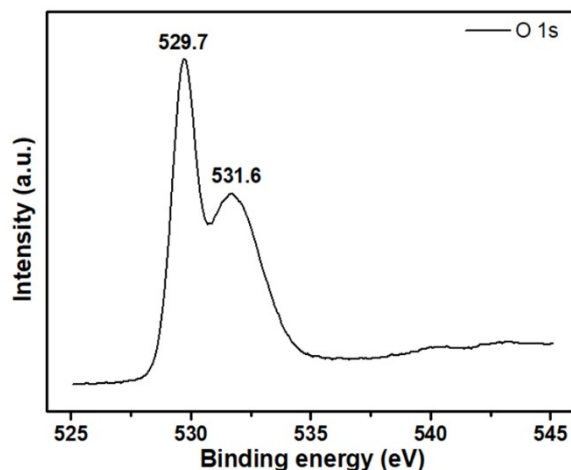

**Fig. S2** O 1s spectrum of sample S<sub>CPS</sub>

As shown in Fig. S2, peaks centred at 529.7 and 531.6 eV of O 1s are attributed to the Mn–O–Mn and Mn–OH groups [4], respectively.

### S1. Electrode preparation and measurement

Working electrodes are constructed by mixing the active material (as-synthesized  $\beta$ -MnO<sub>2</sub>, carbon black and polyvinylidene fluoride (PVDF) in a mass ratio of 8:1:1. Typically, the mixtures were formed into slurries first by adding a small amount of 1-methyl-2-pyrrolidinone solutions. And then the prepared slurries were coated onto a stainless steel grid with an apparent area of 1×1 cm<sup>2</sup>, and dried in vacuum at 80°C for 12 h. Finally, the dried electrodes are pressed under 10 MPa.

For three-electrode, platinum sheet (99.99%), Ag/AgCl cell (in 3 M KCl solution) are selected as counter and reference electrodes, respectively. CV data were collected in 0-0.9 V vs. Ag/AgCl in a scan rate range of 2-100 mV s<sup>-1</sup>. The EIS were measured in a frequency range of 10<sup>5</sup>-10<sup>-2</sup> Hz using an alternating current bias of 5 mV s<sup>-1</sup>. GCDs were evaluated at current densities from 0.5 A g<sup>-1</sup> to 20 A g<sup>-1</sup>. For two-electrode cell, an asymmetric capacitor MnO<sub>2</sub>//AC (activated carbon, purchased by Sinopharm Chemical Reagent Co., Ltd) were assembled and evaluated by CV and GCD in a voltage window of 1.7 V as well, in considering of the stabilities of active materials in working temperature of 5-80 °C. The mass ratio of AC and S-2 was 1.4 calculated by Equation (1) according to the charge balance theory.

$$\frac{m_+}{m_-} = \frac{C_- \Delta V_-}{C_+ \Delta V_+} \quad (1)$$

where  $C_+$  and  $C_-$ ,  $\Delta V_+$  and  $\Delta V_-$  represent the specific capacitance and the potential window of positive and negative electrodes, respectively.

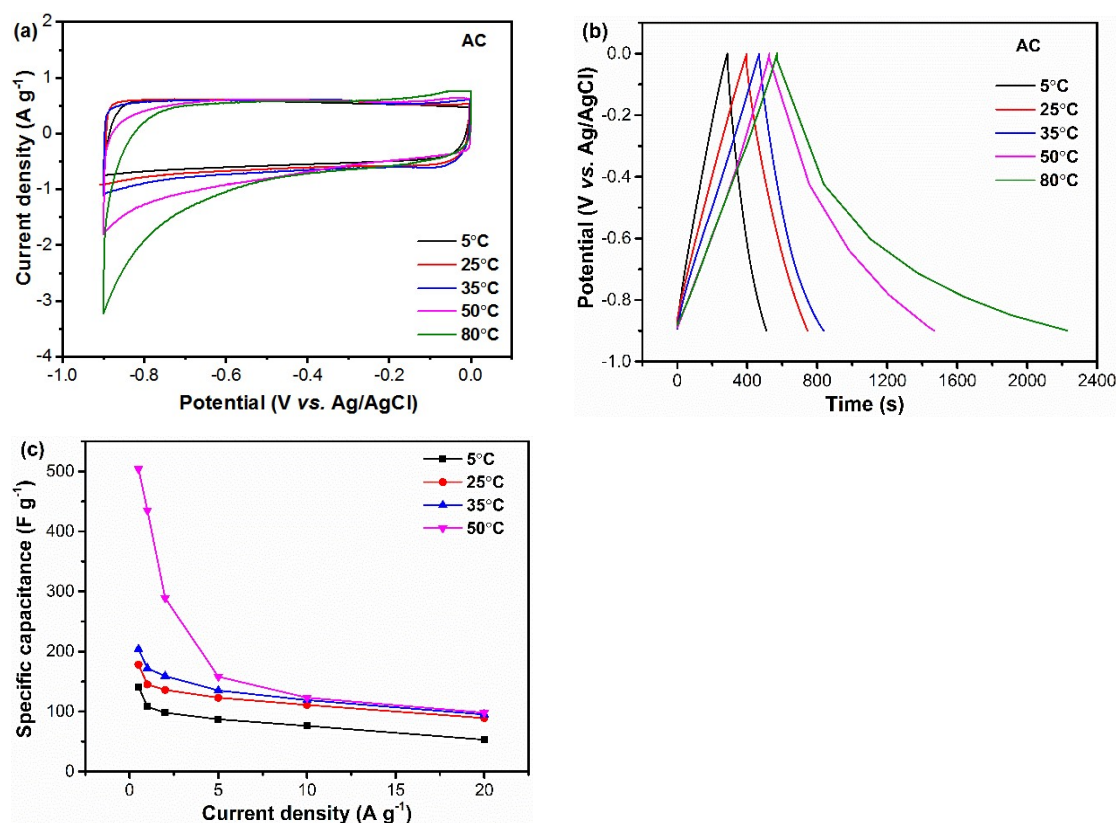

**Fig. S3.** CV curves at 5 mV s<sup>-1</sup> scan rate (a), GCD at a current density of 0.5 A g<sup>-1</sup> (b), specific capacitance vs. charge/discharge current densities of 0.5-20 A g<sup>-1</sup> (c) of commercial active carbon at different working temperature (5-80°C).

Fig.S3a shows the CV curves of commercial activated carbon (AC) in different temperatures at a scan rate of 5 mV s<sup>-1</sup>. It is noted that the CV curves of AC become asymmetry above 50°C due to the hydrogen evolution. This is in accordance with the GCD data. As shown in Fig. S3b, the ideal symmetrical rectangle become asymmetric as the operation temperature is above 35°C. These data suggest that the commercial AC can only working at temperatures of 5-35°C. This is supported by its rate capability. As shown in Fig. S3c, different from those at 5-35°C, the specific capacitance of AC at 50°C decrease dramatically as the current density increasing from 0.5 A g<sup>-1</sup> to 5 A g<sup>-1</sup>, and then become constant, demonstrating its poor rate capability at temperature above

35°C.

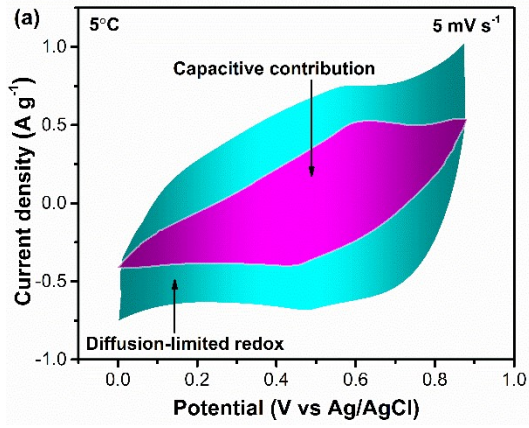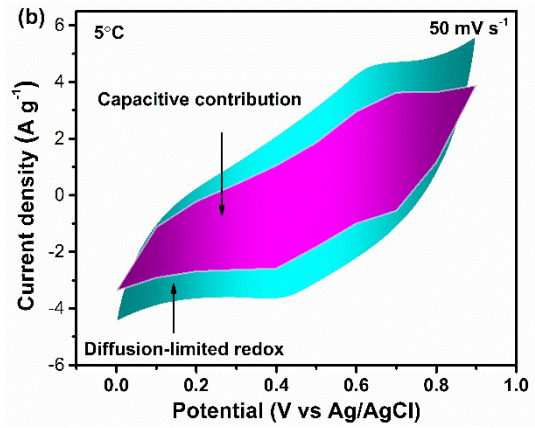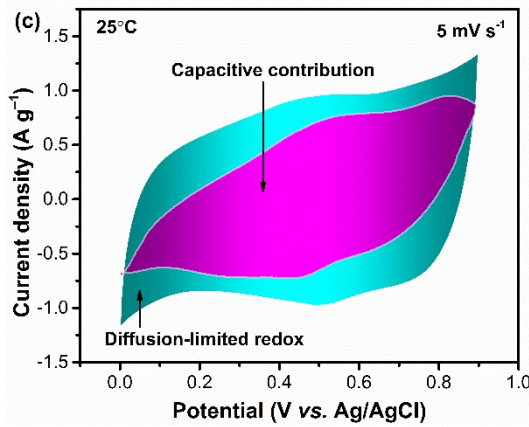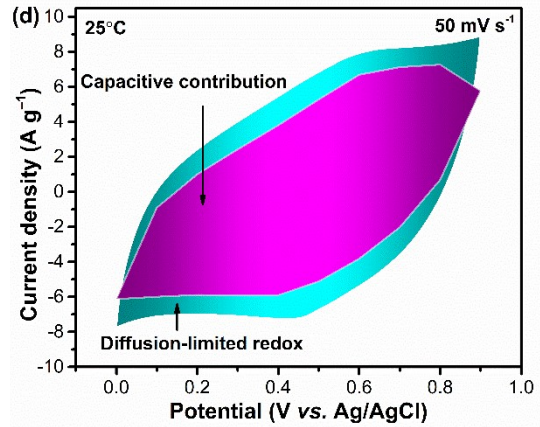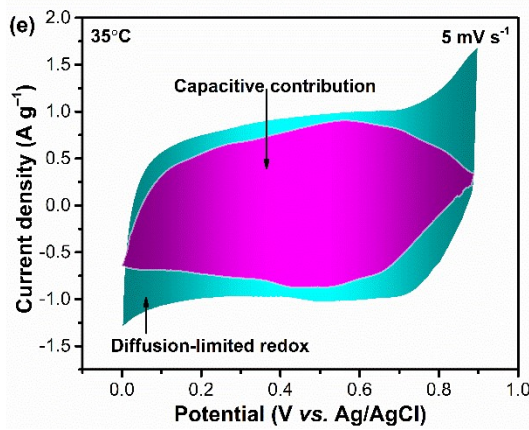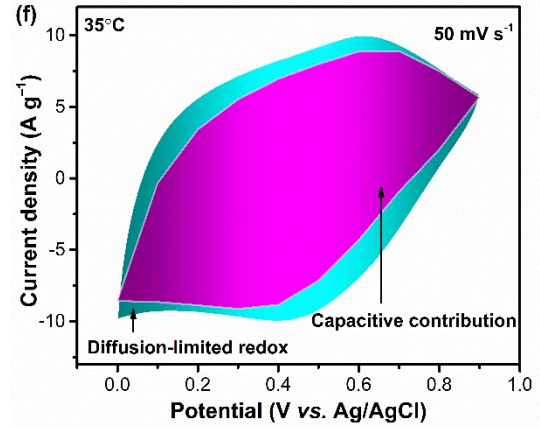

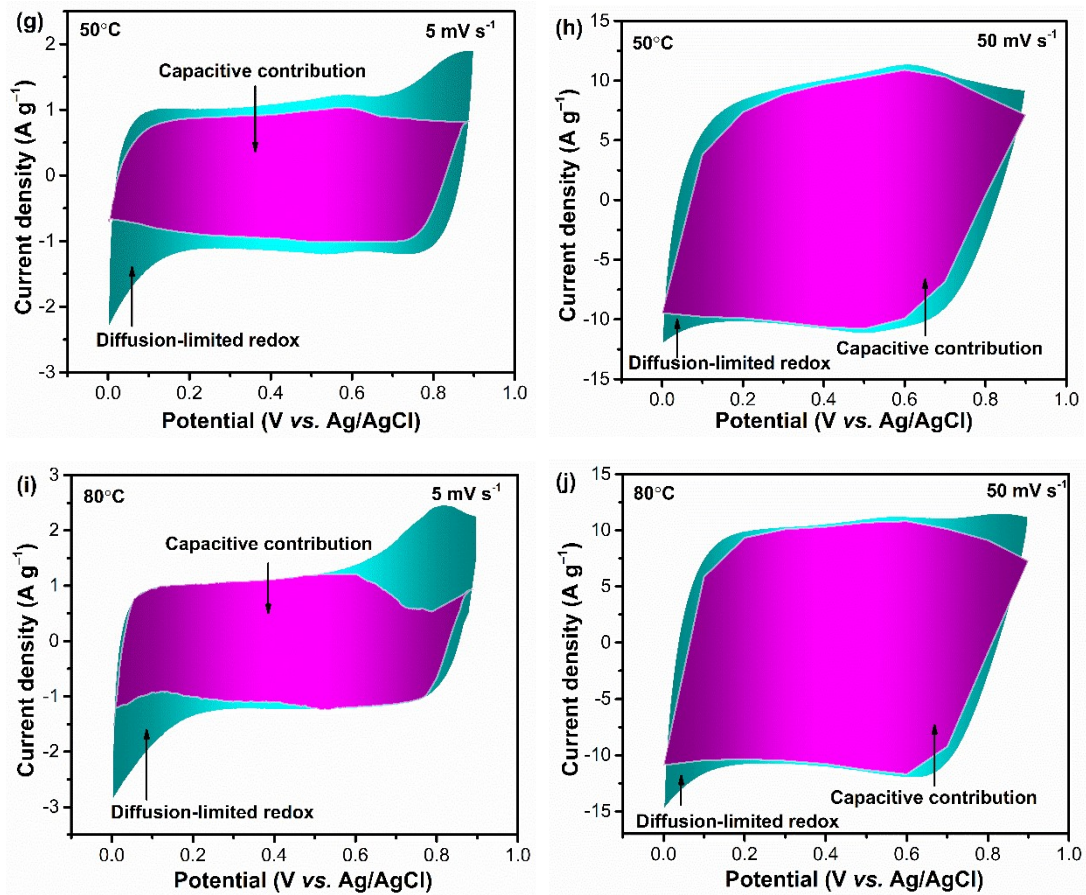

**Fig.S4** Surface-controlled and diffusion-controlled capacitances of electrode  $S_{CPS}$  working at different temperatures (5-80°C) at scan rates of 5  $mV s^{-1}$  (a, c, e, g, i) and 50  $mV s^{-1}$  (b, d, f, h, j), respectively.

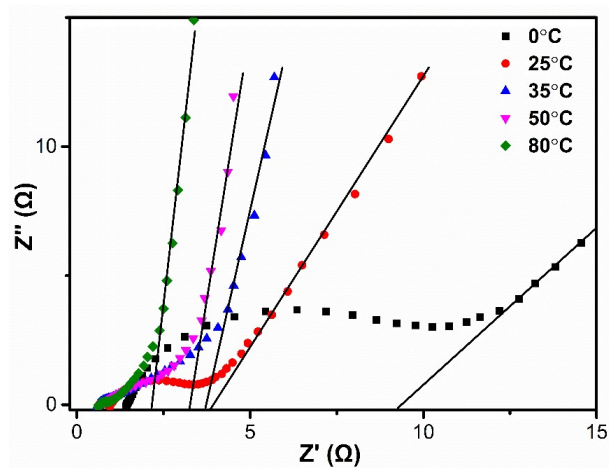

**Fig. S5** The equivalent series resistances (ESRs) of electrode  $S_{CPS}$ .

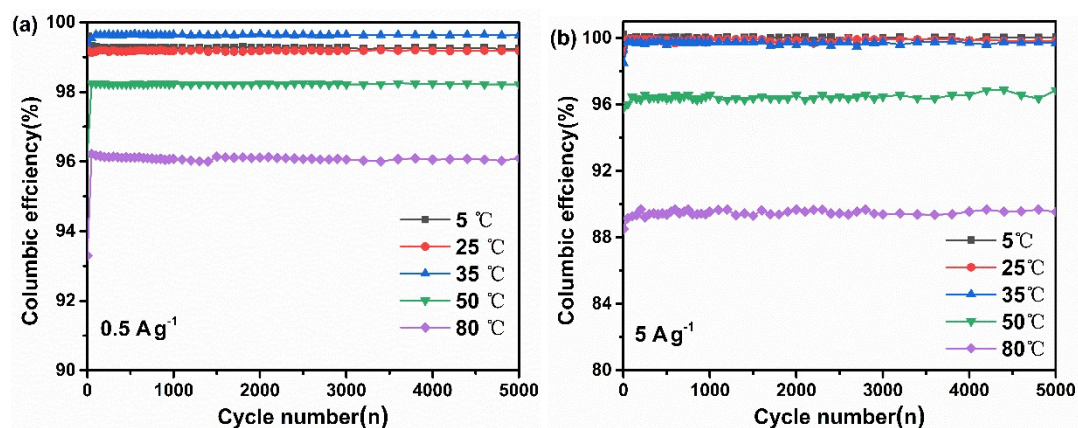

**Fig. S6** The coulomb efficiencies of electrode S<sub>CPS</sub> at 0.5 (a) and 5 (b) A g<sup>-1</sup> after 5000 cycles at working temperatures of 5-80 °C.

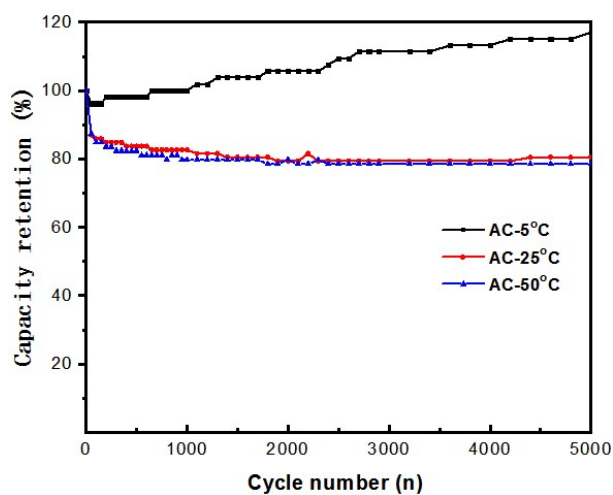

**Fig.S7** Cycle performance of AC after 5000 cycles at 5 A g<sup>-1</sup> in different working temperatures.

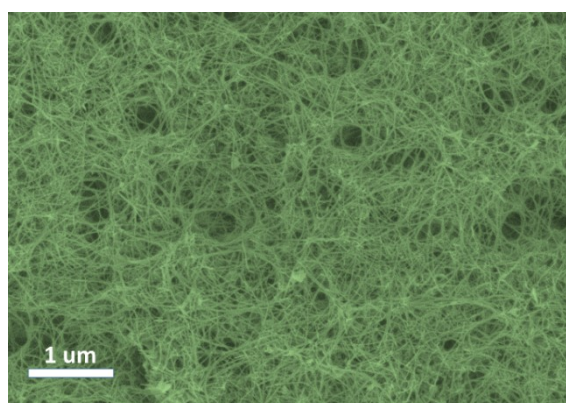

**Fig. S8** SEM image of as-prepared electrode S<sub>CPS</sub> after 5000 cycles at 5 A g<sup>-1</sup> working at 80 °C.

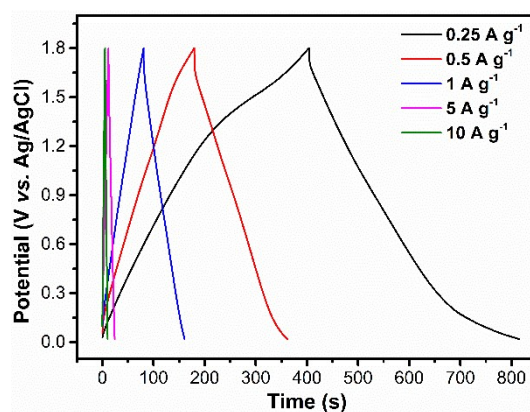

**Fig.S9** GCD curves of  $S_{CPS}$ //AC capacitor working at 25°C.

**Table S2.** The fitted impedance parameters of samples  $S_{CPS}$  at different operation temperatures.

| $T(^{\circ}C)$ | $R_s(\Omega)$ | $R_{ct}(\Omega)$ | $W(\Omega s^{-1/2})$ |
|----------------|---------------|------------------|----------------------|
| 5              | 1.46          | 8.59             | 9.43                 |
| 25             | 0.99          | 4.28             | 5.06                 |
| 35             | 0.70          | 3.22             | 2.47                 |
| 50             | 0.62          | 3.09             | 1.16                 |
| 80             | 0.60          | 2.83             | 1.14                 |

**Table S3.** The equivalent series resistances (ESRs) estimated from the intercept of the low frequency impedance spectrum with the real axis of  $S_{CPS}$  at different working temperatures.

| Test temperature( $^{\circ}C$ ) | Equivalent series resistance (ESR) |
|---------------------------------|------------------------------------|
| 5                               | 9.25                               |
| 25                              | 3.86                               |
| 35                              | 3.67                               |
| 50                              | 3.26                               |
| 80                              | 2.15                               |

## Reference

- [1] Z. Niu, J. Chen, H. H. Hng, J. Ma, X. Chen, A leavening strategy to prepare reduced graphene oxide foams[J]. *Adv. Mater.* 2012, **24**(30): 4144-50.
- [2] L.L. Yu, J. Zhu, J.T. Zhao, Beta-manganese dioxide nanoflowers self-assembled by ultrathin nanoplates with enhanced supercapacitive performance[J]. *J. Mater. Chem. A* 2014, **2**(24): 9353-60.
- [3] R. Li, L.L. Yu, S. Li, J. Fan, R. Luo, J.T. Zhao, Facile synthesis of hierarchical mesoporous beta-manganese dioxide nanoflowers with extremely high specific surface areas for high-performance electrochemical capacitors[J]. *Electrochim. Acta* 2018, **284**: 52-9.
- [4] D. P. Dubal, R. Holze, Self-assembly of stacked layers of  $Mn_3O_4$  nanosheets using a scalable chemical strategy for enhanced, flexible, electrochemical energy storage[J]. *J. Power Sources* 2013, **238**: 274-282.
